# Supplementary material for: Key Aroma Compounds of Dark Chocolates Differing in Organoleptic Properties: A GC-O Comparative Study
Source: PubMed Central journal article supplement (PMC7221797; doi:10.3390/molecules25081809), 2020-04-15
Supplement: molecules-25-01809-s001.pdf [file molecules-25-01809-s001.pdf]

## Key aroma compounds of dark chocolates differing in organoleptic properties. A GC-Olfactometry comparative study

Zoé Deuscher <sup>1,2</sup>, Karine Gourrat <sup>1,3</sup>, Marie Repoux <sup>4</sup>, Renaud Boulanger <sup>2</sup>, Hélène Labouré <sup>1</sup>, and Jean-Luc Le Quéré <sup>1,\*</sup>

<sup>1</sup> Centre des Sciences du Goût et de l'Alimentation (CSGA), AgroSup Dijon, CNRS, INRAE, Université de Bourgogne Franche-Comté, F-21000 Dijon, France

<sup>2</sup> Qualisud, Univ Montpellier, CIRAD, Montpellier SupAgro, Univ d'Avignon, Univ de La Réunion,, F-34000 Montpellier, France

<sup>3</sup> ChemoSens Platform, CSGA, F-21000 Dijon, France

<sup>4</sup> Valrhona, 14 av. du Président Roosevelt, F-26602 Tain l'Hermitage, France

\* Correspondence: jean-luc.le-quere@inrae.fr

Figure S1

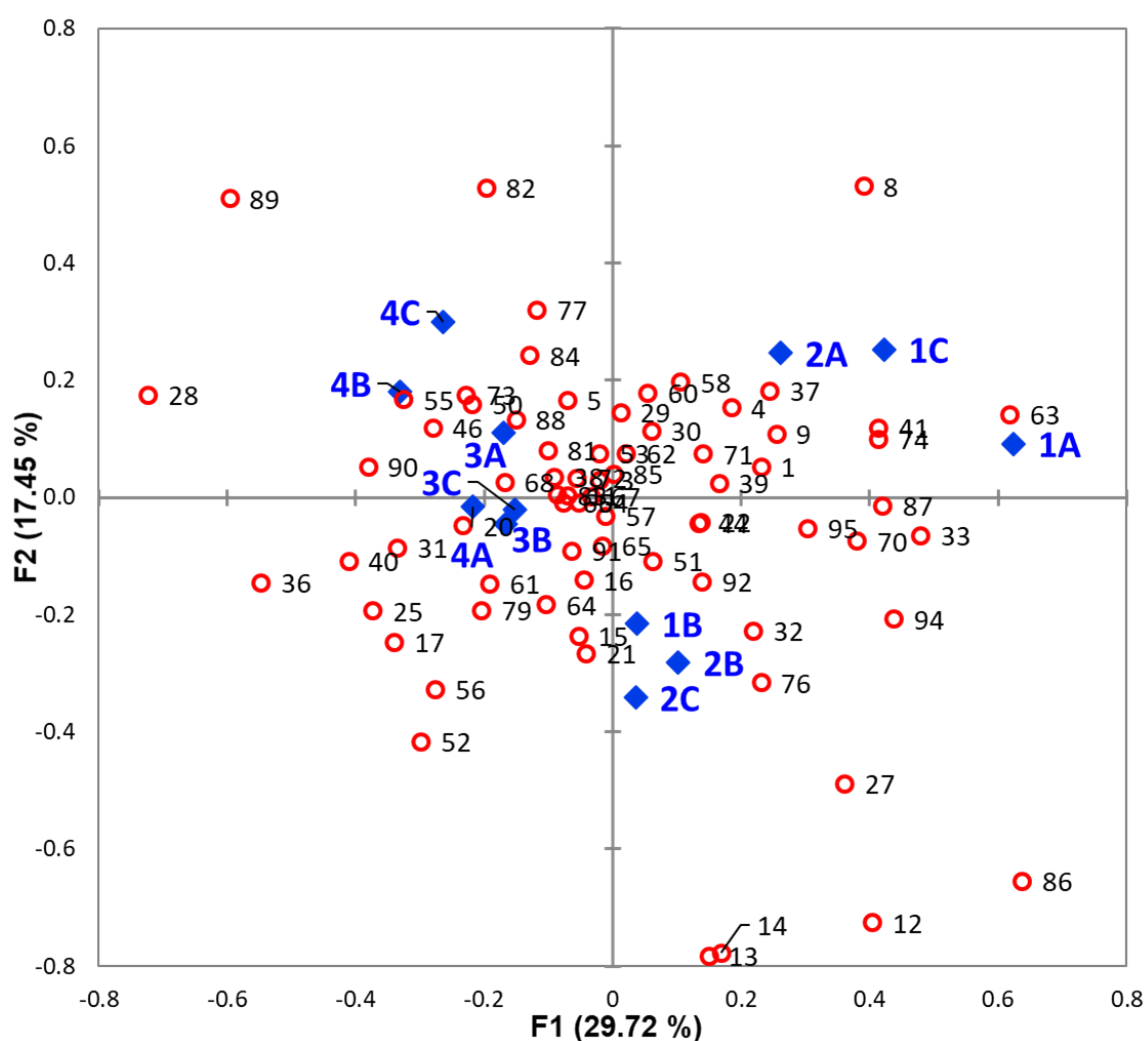

**Figure S1.** Correspondence analysis (CA) between the 12 samples and the 73 discriminant OAs defined by their NIF values using a NIF difference threshold >30%. OAs (light red circles) are plotted according to their NIF in samples (plain blue diamonds) in the dimensions 1 and 2 (cumulative inertia: 47.17%). The OA numbers are those found in Table 1. CA independence test:  $\text{K}hi^2 = 8540$  (critical value 859,  $\alpha = 0.05$ , degrees of freedom = 792),  $p < 0.0001$ .

Figure S2

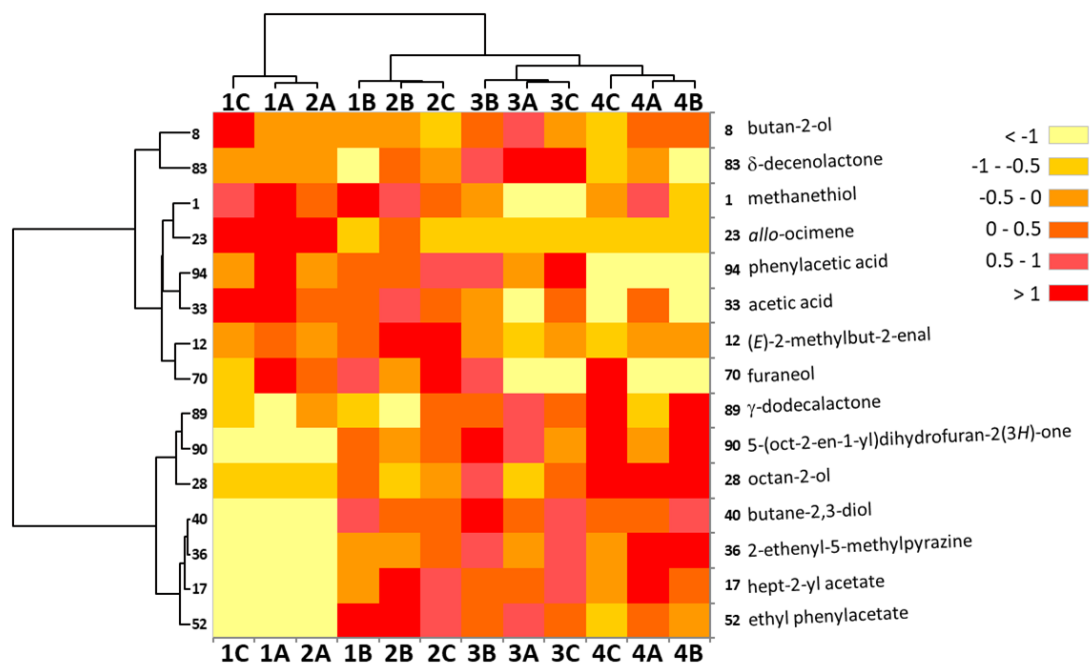

**Figure S2.** Heatmap displaying the results of a hierarchical cluster analysis (HCA) conducted independently on both samples and variables (OAs) dimensions, for the 31 “discriminant” OAs (see discussion). NIF values importance varies from  $>1$  (highest value, in red) to  $< -1$  (lowest values, in yellow). OA numbers are those found in Table 1. The data were centered and scaled; dissimilarity Euclidian distances were used with the Ward amalgamation method; % (std) non-specific filtering was used with a 50% threshold, resulting in the display of the only 15 variables with the highest std.
